# Supplementary material for: Fabrication and electrochemical properties of novel nanoporous platinum network electrodes
Source: Royal Society of Chemistry journal article supplement (doi:10.1039/b412677g), 2004-01-01
Supplement: b412677g.doc [file b412677g.doc]

Equivalent circuit used to fit the impedance spectra presented in Figure 2-d.


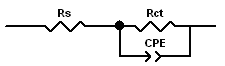


where Rs is the uncompensated solution resistance; Rct denotes the charge-transfer resistance; and CPE is an constant phase element.

Mathematically, a CPE's impedance is given by:

If CPE_P equals one, then the CPE is considered a capacitor.

**Table S1** The values for the parameters Rct, CPE_T, CPE_P and their associated error % computed by fitting of the experimental EIS data (Fig 2-d).a

|  | **Rct (Ω cm2) CPE_T (mF cm-2)** **CPE_P** |
| --- | --- |
| **Electrode** | **Value Error% Value Error% Value Error%** |
| Pt wire 7178 3.15 0.14 2.49 0.83 0.46  S1 1525 5.88 0.57 4.15 0.93 1.07  S2 275 5.77 1.83 5.29 0.95 1.42 | |

aExperiment data were measured in 0.5 M H2SO4 + 0.1 M CH3OH solutions at an electrode potential of 300 mV.
